# Supplementary material for: The coupling of transcriptome and proteome adaptation during development and heat stress response of tomato pollen
Source: PubMed Central journal article supplement (PMC5994098; doi:10.1186/s12864-018-4824-5), 2018-06-08
Supplement: 12864_2018_4824_MOESM1_ESM.pdf [file 12864_2018_4824_MOESM1_ESM.pdf]

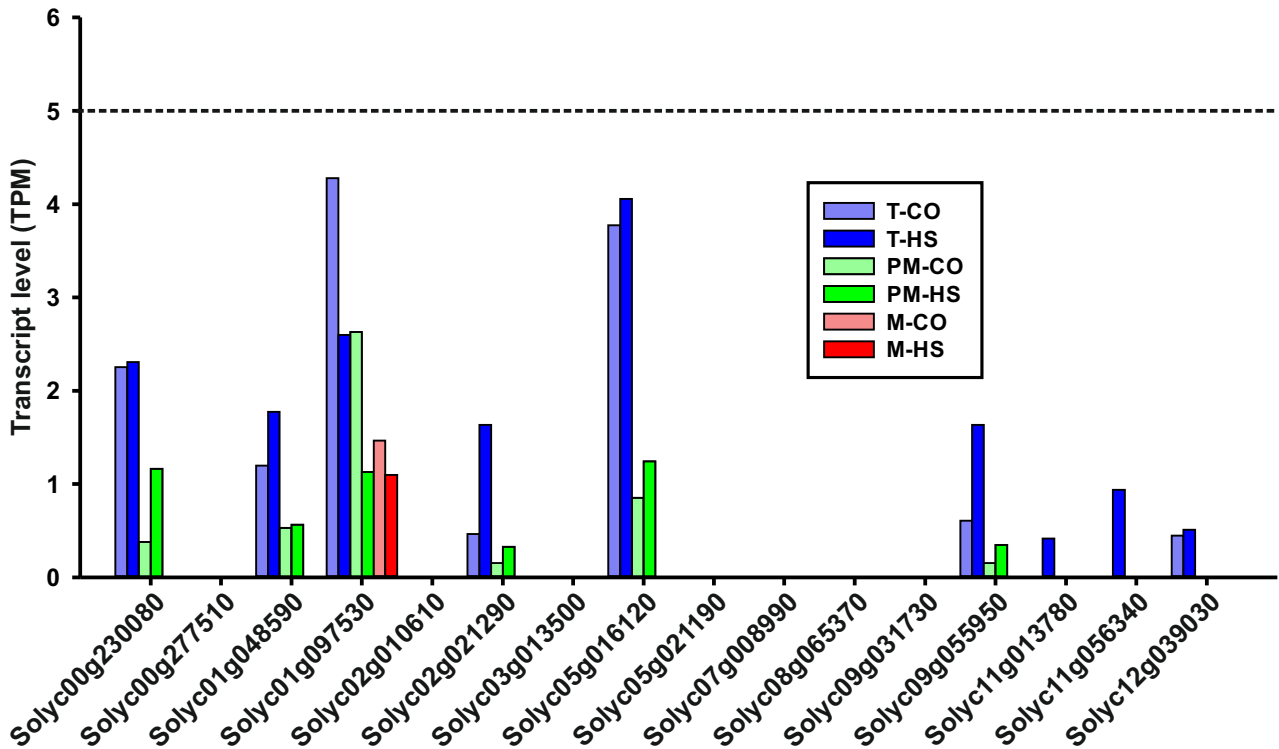

**Figure S1. Threshold estimation based on light-harvesting complex genes**

Shown are transcript levels (average of two biological replicates) of 16 genes encoding for light-harvesting complex proteins. Transcripts of these genes are not expected to be detected in pollen and therefore served for estimation of a suitable detection threshold. The derived threshold of 5 TPM is represented by the horizontal line.

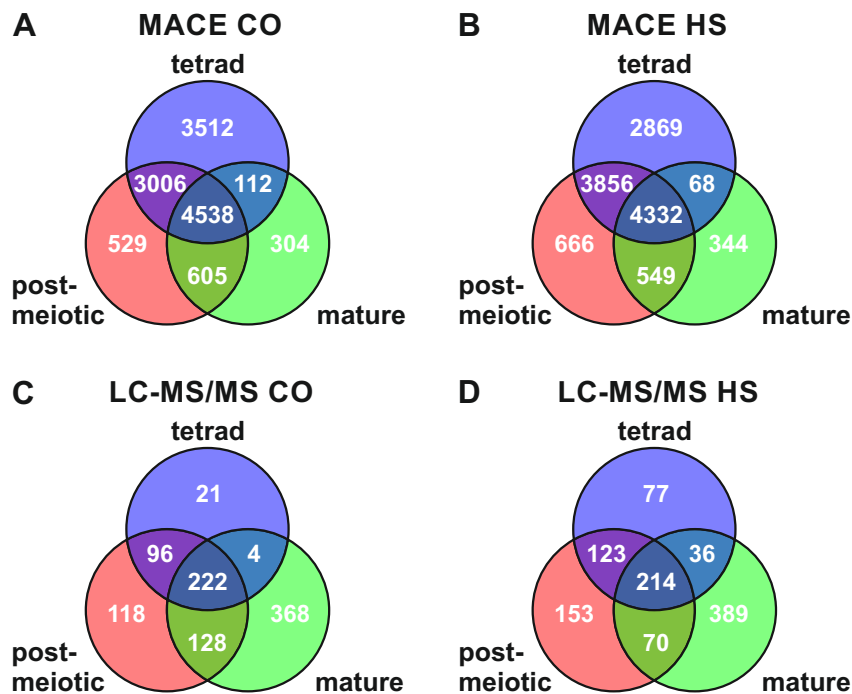

**Figure S2. Differences between developmental stages in transcriptome and proteome content**

Shown are venn diagrams for detected transcripts (A and B) and protein groups (C and D) under CO and HS for pollen in tetrad, post-meiotic and mature stage.

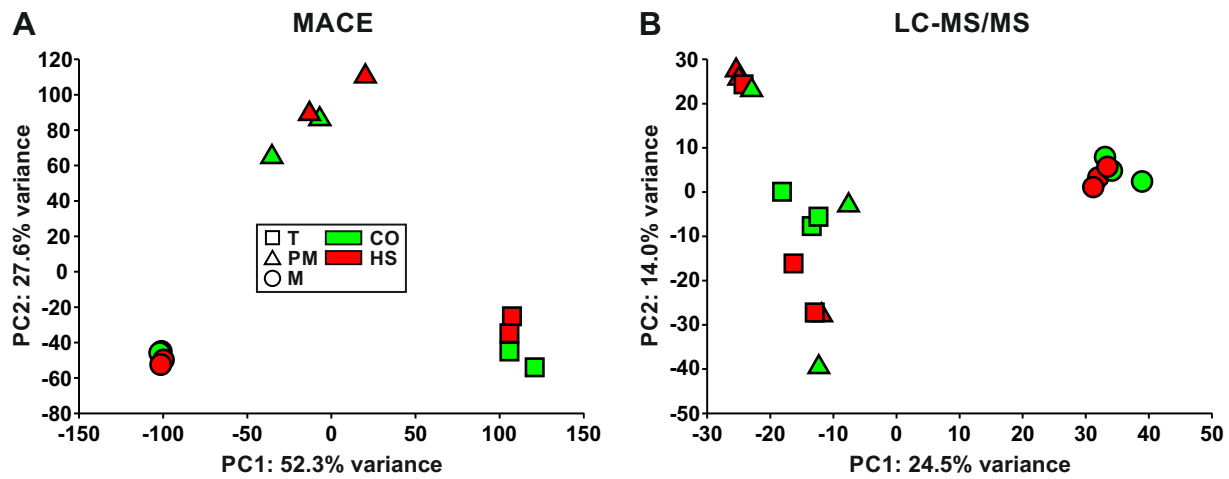

**Figure S3. PCA plots (PC1 and 2) of pollen developmental stages under CO and HS**  
 (A and B) Shown are PCA plots for tomato pollen at tetrad (square), post-meiotic (triangle) and mature stage (circle) under CO (green) and HS (red) based on measured transcript (A, MACE) and protein levels (B, LC-MS/MS). Axes are labeled with the variance explained by the first and second dimension, respectively.

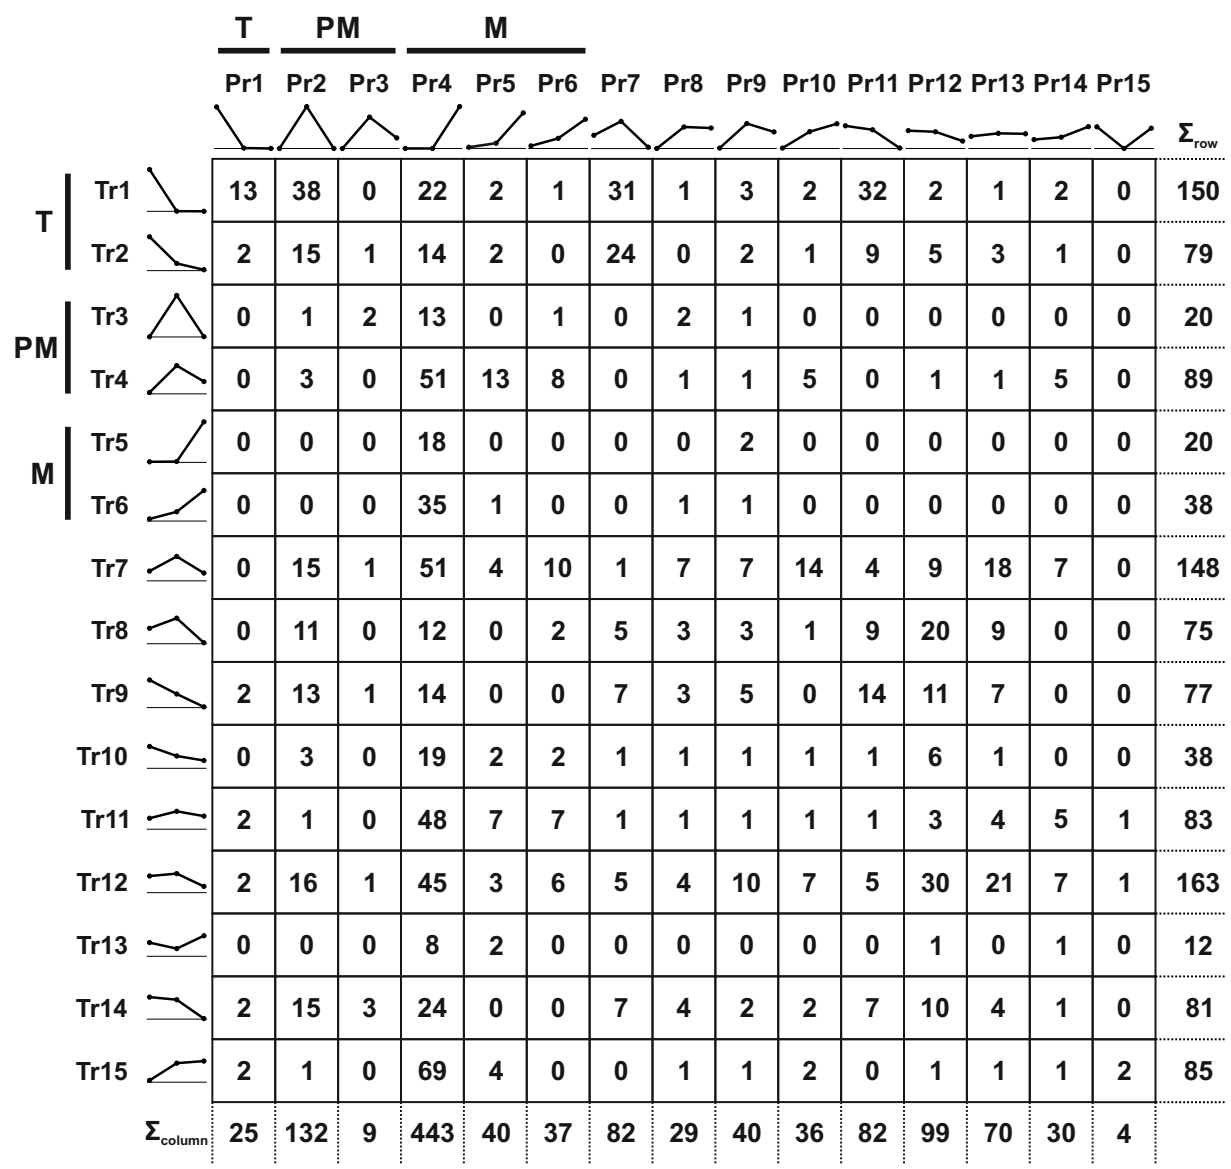

**Figure S4. Overlap matrix of transcript and protein development clusters**  
 Shown is the overlap of genes between transcript (Tr) and protein (Pr) clusters. Genes were clustered based on their relative transcript or protein levels across tetrads, post-meiotic and mature pollen. Next to each cluster the corresponding profile is given. In addition, tetrad (T), post-meiotic (PM) and mature (M) increased transcript and protein clusters were defined.

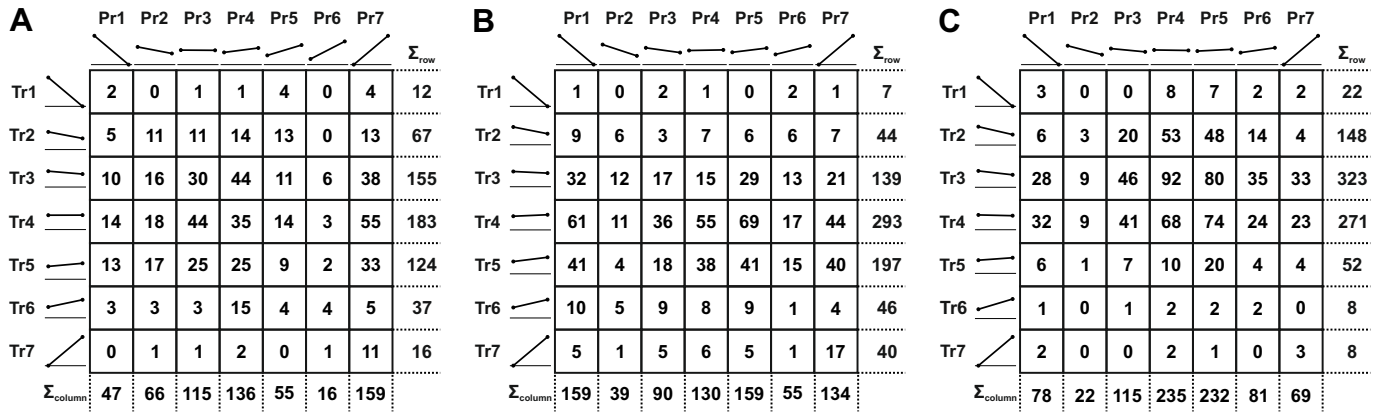

**Figure S5. Overlap matrix of transcript and protein HS clusters**

Shown is the overlap of genes between transcript (Tr) and protein (Pr) clusters for tetrads (A), post-meiotic (B) and mature pollen (C). Genes were clustered based on their relative transcript or protein levels across CO and HS. Next to each cluster the corresponding profile is given.

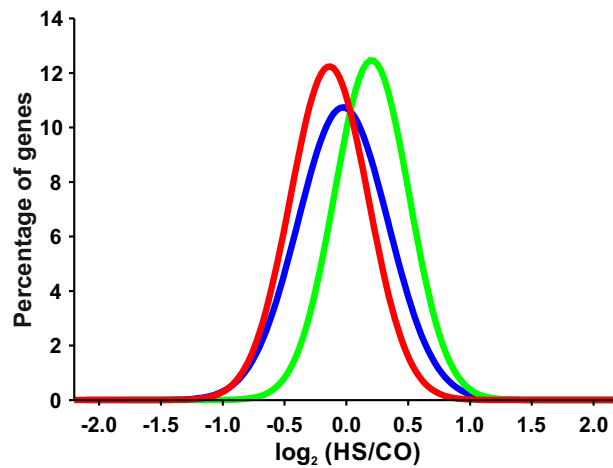

**Figure S6.  $\log_2$  fold change distribution of transcript levels between HS and CO**

Shown is the  $\log_2$  fold change distribution of transcript levels (TPM) between HS and CO for tetrads (blue), post-meiotic (green) and mature pollen (red).
